# Supplementary material for: Reduced dosage of β-catenin provides significant rescue of cardiac outflow tract anomalies in a Tbx1 conditional null mouse model of 22q11.2 deletion syndrome
Source: PubMed Central journal article supplement (PMC5386301; doi:10.1371/journal.pgen.1006687), 2017-03-27
Supplement: pgen.1006687.s001.pdf [file pgen.1006687.s001.pdf]

|                                                                                    |    |                  |                         |  |
|------------------------------------------------------------------------------------|----|------------------|-------------------------|--|
| S1 Table (Related to Figs. 2 and 4)                                                |    |                  |                         |  |
|                                                                                    |    |                  |                         |  |
| Embryo genotypes used as controls                                                  |    | Heart morphology |                         |  |
|                                                                                    |    |                  |                         |  |
|                                                                                    | N  | Normal (%)       |                         |  |
| <i>First Tbx1 LOF and rescue crosses</i>                                           |    |                  |                         |  |
| <i>Mef2c-AHF-Cre/+; Tbx1f/+; βcat f/+</i>                                          | 8  | 100%             |                         |  |
| <i>Mef2c-AHF-Cre/+; Tbx1f/+</i>                                                    | 10 | 100%             |                         |  |
| <i>Second Tbx1 LOF and rescue crosses (to test for genetic background effects)</i> |    |                  |                         |  |
| <i>Mef2c-AHF-Cre/+; Tbx1f/+; βcat f/+</i>                                          | 3  | 100%             |                         |  |
| <i>Mef2c-AHF-Cre/+; Tbx1f/+</i>                                                    | 10 | 100%             |                         |  |
| <i>Tbx1 f/+; βcat f/+</i>                                                          |    |                  |                         |  |
|                                                                                    | 4  | 100%             |                         |  |
| <i>Mef2c-AHF-Cre/+; βcat f/+</i>                                                   | 7  | 100%             | Same as Ai et al., 2007 |  |
| <i>Mef2c-AHF-Cre/+; βcat f/f</i>                                                   | 5  | 0%               | Same as Ai et al., 2007 |  |
| <i>βcat f/+</i>                                                                    | 2  | 100%             |                         |  |
| <i>Mef2c-AHF-Cre/+; βcat E3/+</i>                                                  | 3  | 0%               | Same as Ai et al., 2007 |  |
| <i>βcat E3/+</i>                                                                   | 4  | 100%             | Same as Ai et al., 2007 |  |
