# Supplementary material for: Reduced dosage of β-catenin provides significant rescue of cardiac outflow tract anomalies in a Tbx1 conditional null mouse model of 22q11.2 deletion syndrome
Source: PubMed Central journal article supplement (PMC5386301; doi:10.1371/journal.pgen.1006687), 2017-03-27

S3 Fig. Related to Figs 2 and 5.

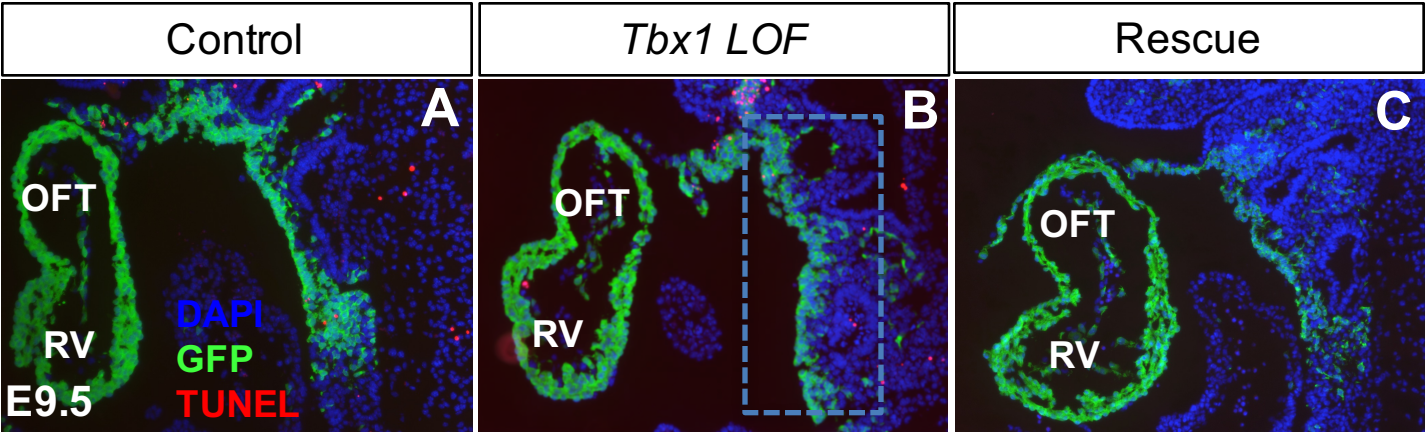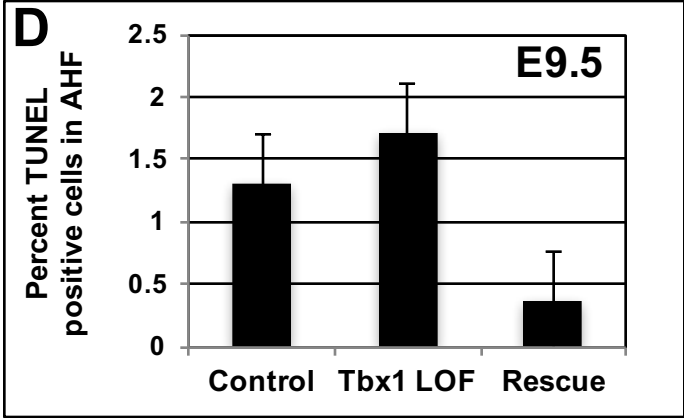

Supplement: pgen.1006687.s004.pdf [file pgen.1006687.s004.pdf]
